# Supplementary material for: How Bacterial Chemoreceptors Evolve Novel Ligand Specificities
Source: PubMed Central journal article supplement (PMC6974571; doi:10.1128/mbio.03066-19), 2020-01-21
Supplement: mBio.03066-19-sf002.pdf [file mBio.03066-19-sf002.pdf]

Fig.S2

A

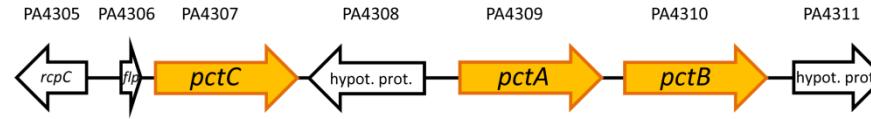

B

|             | 10                                                                        | 20               | 30                                            | 40  | 50  | 60  | 70  |
|-------------|---------------------------------------------------------------------------|------------------|-----------------------------------------------|-----|-----|-----|-----|
| <b>PctA</b> | MIKSLKFSHK                                                                | ILAAASLVVFAAFALF | TLYNDYLQRNAIREDLESYLREMGDVTSSNIQNWLGRRLLLVEQ  |     |     |     |     |
| <b>PctB</b> | MIKSLKFSHK                                                                | ILAAALVVIATFSLF  | TLYNDYSLQRASIREDLEDYLHEMGEITASNQVNWLSGRILLIEN |     |     |     |     |
| <b>PctC</b> | MLRSLSFAKK                                                                | ILAAALVVVFAFSCF  | ILYNDYRQREAVRTDTENYLGEIGTLTASNIQSWLEGRMHLVVEG |     |     |     |     |
|             | 80                                                                        | 90               | 100                                           | 110 | 120 | 130 | 140 |
| <b>PctA</b> | TAQTLARDHSP--ETVSALLEQPALSTFSFTYLGGQD--GVFTMRPDSMPAGYDPRSRPWYKDAVAAGG     |                  |                                               |     |     |     |     |
| <b>PctB</b> | LAQTLARDHSP--ETTQALLEQPLLGSTFLFTYLGGTD--GTYTARPTSDLPADYDPRRRPWYNAATSAGQ   |                  |                                               |     |     |     |     |
| <b>PctC</b> | LASQLALLDQPDEANIRQLEQPVFSRNFASVYLGEAASGFTMRPHYDAMPEGYDPRTRAWYKDALAADR     |                  |                                               |     |     |     |     |
|             | 150                                                                       | 160              | 170                                           | 180 | 190 | 200 | 210 |
| <b>PctA</b> | LTLTEPYVDAAEQELIITAATPVKAAGNTLGVVGGDLSLKTIVQIINSLDFSGMGYAFVLSVGDGKILVHP   |                  |                                               |     |     |     |     |
| <b>PctB</b> | TTLTEPYMEPAIHELVLVLTIASPARQGGQPFVGGDLSLQTVVKIINSLDFSGMGYAFVLSVGDGKILVHP   |                  |                                               |     |     |     |     |
| <b>PctC</b> | LIVTEPFVDAGTGEQILAMSLPVRHAGQLLGVAAAGEWKLTLTALINSLKFDGAGYAFVLSVADAGKILLHP  |                  |                                               |     |     |     |     |
|             | 220                                                                       | 230              | 240                                           | 250 | 260 | 270 | 280 |
| <b>PctA</b> | DKEQVMKTLSEVYPQNTPKIATGFSEAEHLGHTRILAFTPKIGLPSVTWYLAISIDKDKAYAMLSKFRVS    |                  |                                               |     |     |     |     |
| <b>PctB</b> | DKDQVMKSLSDVYPRNTPKIGSGFSEAEHLGNTRILSFPVKGLSGLDWYIGISVDKDKAYAMLTCLRVS     |                  |                                               |     |     |     |     |
| <b>PctC</b> | DSGLVLKTLAEAYPKGAPNIVPGVHEVELDSSQFVSVFTPVKGLPGVTWYVALVDRDTAYSMLSEFRTS     |                  |                                               |     |     |     |     |
|             | 290                                                                       | 300              | 310                                           | 320 | 330 | 340 | 350 |
| <b>PctA</b> | ATAAALISIVAIVLLGLLIRLLMQPLHLMGRAMQDIAQEGDGTKRLAVTSRDEFGVLGDAFNQFVERI      |                  |                                               |     |     |     |     |
| <b>PctB</b> | AIVAAALIAVVAIVLLGLLIRVLMQPLDMGRAMQDIAQEGDGTKRLKVTNSNDEFGALATISFNRFVERI    |                  |                                               |     |     |     |     |
| <b>PctC</b> | AIVATLIAVVGIMLLGLLIRVLMQPLDMGRAMQDIAQEGDGTKRLKVTNSNDEFGTLANAFNRFVERI      |                  |                                               |     |     |     |     |
|             | 360                                                                       | 370              | 380                                           | 390 | 400 | 410 | 420 |
| <b>PctA</b> | HRSIREVAGTAHKLHDVSQLVVNASNSSMANSDEQSNRTNSVAAAINELGAAAQEIARNAADASHHASDA    |                  |                                               |     |     |     |     |
| <b>PctB</b> | HESIREVAGTARQLHDVAQLVVNASNSSMANSDEQSNRTNSVAAAINELGAAAQEIARNAADASHHASDA    |                  |                                               |     |     |     |     |
| <b>PctC</b> | HESIREVAGTARQLHDVAQLVVNASNSSMANSDEQSNRTNSVAAAINELGAAAQEIARNAADASHHASDA    |                  |                                               |     |     |     |     |
|             | 430                                                                       | 440              | 450                                           | 460 | 470 | 480 | 490 |
| <b>PctA</b> | NHQAEDGKQVVEQTIRAMNELSEKISASCANIEALNSRTVNIQILEVIKIGISEQTNLLALNAAIEAARA    |                  |                                               |     |     |     |     |
| <b>PctB</b> | NHQAEDGKQVVEQTIRAMNELSEKISASCANIEALNSRTVNIQILEVIKIGISEQTNLLALNAAIEAARA    |                  |                                               |     |     |     |     |
| <b>PctC</b> | NHQAEDGKQVVEQTIRAMNELSEKISASCANIEALNSRTVNIQILEVIKIGISEQTNLLALNAAIEAARD    |                  |                                               |     |     |     |     |
|             | 500                                                                       | 510              | 520                                           | 530 | 540 | 550 | 560 |
| <b>PctA</b> | GEAGRGFAVVAVEVRNLAHRAQESAQQIQKMIIEELQVGAREAVATMTESQRYSLVESVEIANRAGESLSV   |                  |                                               |     |     |     |     |
| <b>PctB</b> | GEAGRGFAVVAVEVRNLAHRAQESAQQIQKMIIEELQIGAQEAVSMTESQRYSLVESVEIANRAGERLSV    |                  |                                               |     |     |     |     |
| <b>PctC</b> | GEAGRGFAVVAVEVRNLAHRAQESAQQIQKMIIEELQVGAREAVATMTESQRYSLVESVEIANRAGERLSV   |                  |                                               |     |     |     |     |
|             | 570                                                                       | 580              | 590                                           | 600 | 610 | 620 | 630 |
| <b>PctA</b> | TRRIGEIDGMNQVLATATEEQTAVVDSLNM DITEINTLNQEGVENLQATLRACGELETQAGRRLQLVDSFKI |                  |                                               |     |     |     |     |
| <b>PctB</b> | TGRIAEIDGMNQSVATATEEQTAVVDSLNM DITEINTLNQEGVENLQATLRACGELETQAGRRLQLVDSFKI |                  |                                               |     |     |     |     |
| <b>PctC</b> | TSRIGEIDSMNQCVATATEEQTAVVDSLNM DITEINTLNQEGVENLQATLRACGELETQAGRRLHLVDSFKI |                  |                                               |     |     |     |     |
