# Supplementary material for: How Bacterial Chemoreceptors Evolve Novel Ligand Specificities
Source: PubMed Central journal article supplement (PMC6974571; doi:10.1128/mbio.03066-19), 2020-01-21

Fig. S3

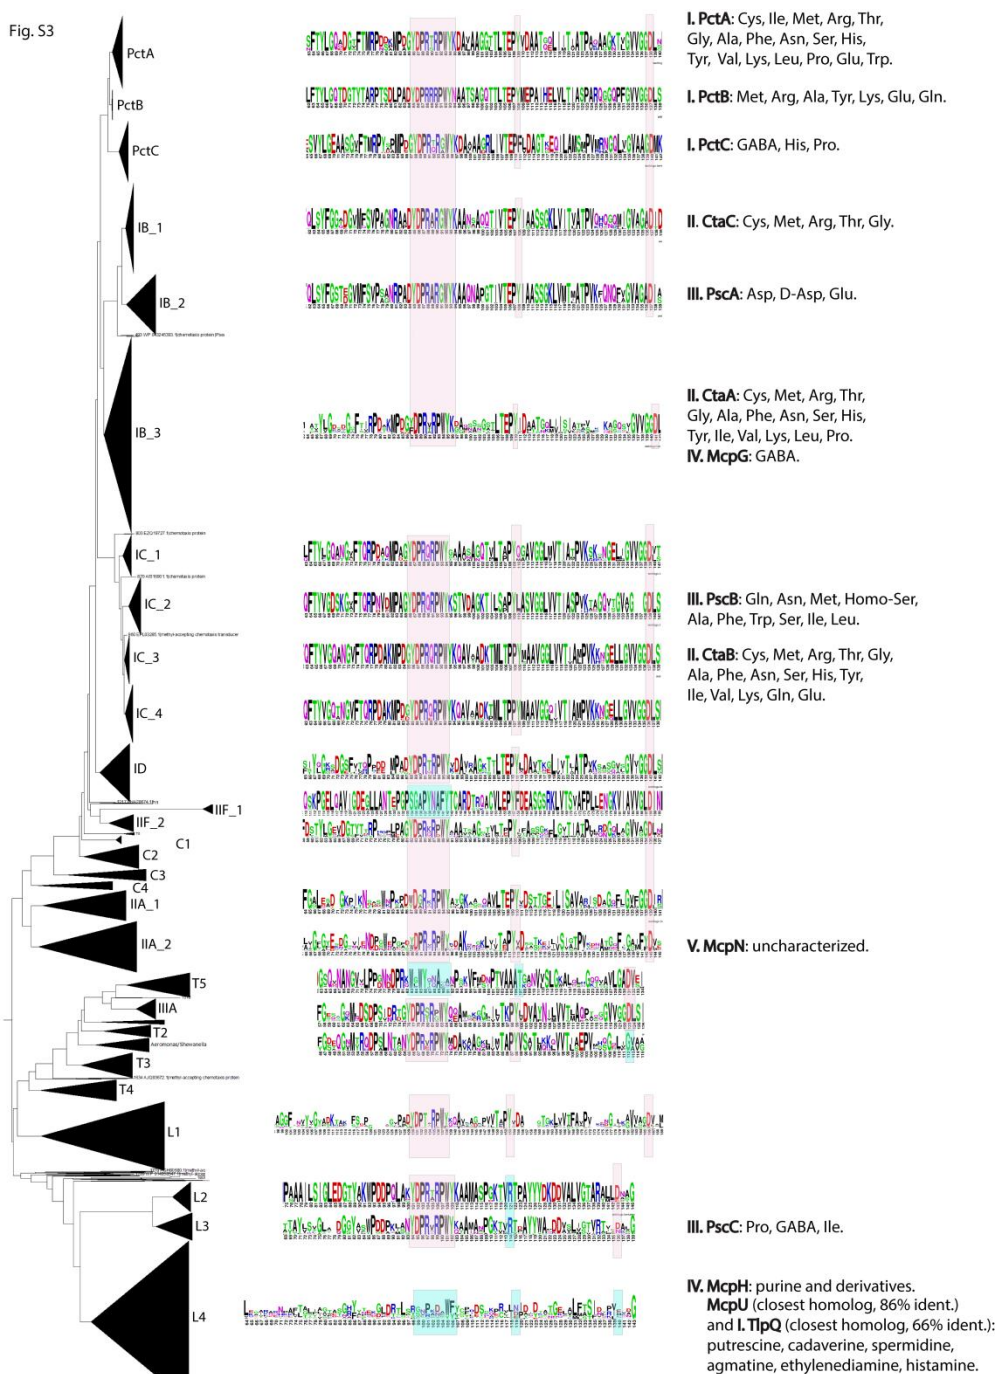

Supplement: mBio.03066-19-sf003.pdf [file mBio.03066-19-sf003.pdf]
