# Supplementary material for: How Bacterial Chemoreceptors Evolve Novel Ligand Specificities
Source: PubMed Central journal article supplement (PMC6974571; doi:10.1128/mbio.03066-19), 2020-01-21

Fig. S5

PctA-LBD/L-Trp

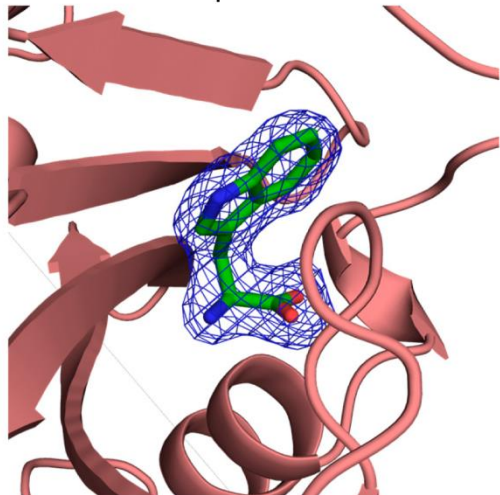

PctA-LBD/L-Ile

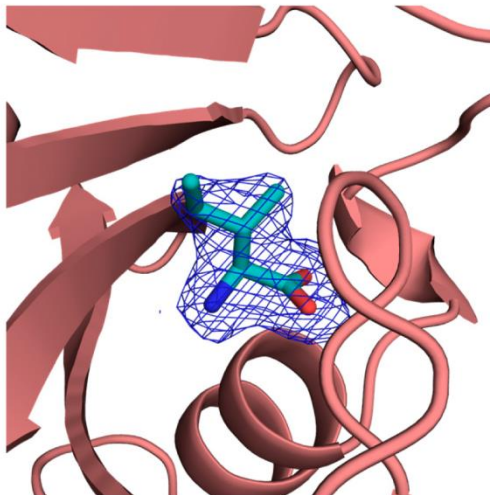

PctA-LBD/L-Met

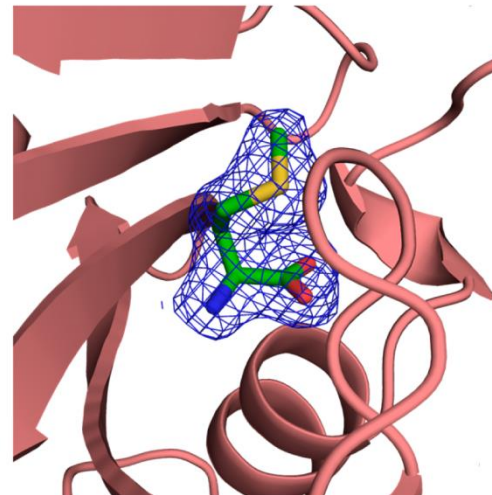

PctB-LBD/L-Gln

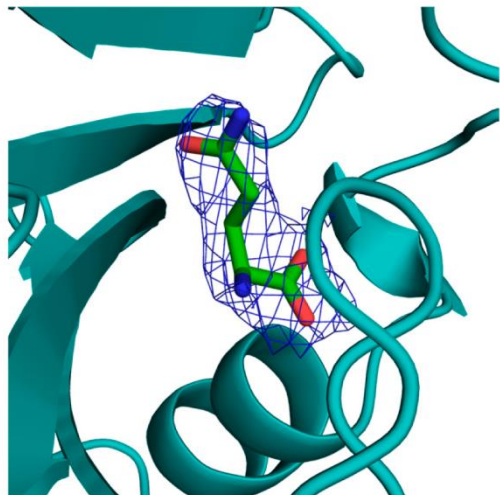

PctB-LBD/L-Arg

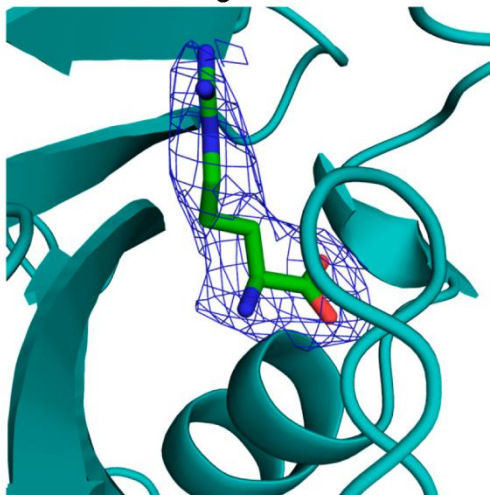

PctC-LBD/GABA

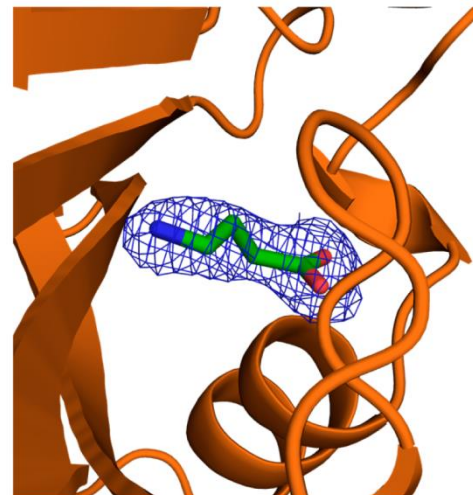

Supplement: mBio.03066-19-sf005.pdf [file mBio.03066-19-sf005.pdf]
