# Supplementary material for: How Bacterial Chemoreceptors Evolve Novel Ligand Specificities
Source: PubMed Central journal article supplement (PMC6974571; doi:10.1128/mbio.03066-19), 2020-01-21
Supplement: mBio.03066-19-st001.pdf [file mBio.03066-19-st001.pdf]

**B) Alignment with homologous structures deposited in the pdb databank.** Listed are the closest matches from a DALI alignment of structures in the pdb database with the structure of PctA-LBD\_L-Ile.

|           | PDB  | Z    | RMSD | % ID | organism                           | Prot family      | ligands                                                                      | Ref.        |
|-----------|------|------|------|------|------------------------------------|------------------|------------------------------------------------------------------------------|-------------|
| PctB      | 5lt9 | 31.6 | 1.4  | 70   | <i>P. aeruginosa</i>               | chemoreceptor    | 5 amino acids                                                                | This work   |
| Mlp37     | 5ave | 27.3 | 2.4  | 32   | <i>Vibrio cholerae</i>             | chemoreceptor    | 9 amino acids/taurine                                                        | (1)         |
| PctC      | 5ltv | 25.5 | 2.5  | 54   | <i>P. aeruginosa</i>               | chemoreceptor    | GABA, His, Pro                                                               | This work   |
| Mlp24     | 6ior | 23.4 | 2.9  | 31   | <i>Vibrio cholerae</i>             | chemoreceptor    | 11 amino acids                                                               | (2)         |
| McpX      | 6d8v | 21.4 | 2.2  | 19   | <i>Sinorhizobium meliloti</i>      | chemoreceptor    | Quaternary amines                                                            | (3)         |
| Z3        | 3lib | 20.9 | 2.3  | 22   | <i>Methanosarcina mazei</i>        | histidine kinase | ?                                                                            | (4)         |
| Tlp1      | 4wy9 | 20.5 | 2.8  | 17   | <i>Campylobacter jejuni</i>        | chemoreceptor    | L-Asp <sup>1</sup>                                                           | (5)         |
| Z6        | 3lic | 19.9 | 2.9  | 19   | <i>Shewanella oneidensis</i>       | histidine kinase | -                                                                            | (4)         |
| Z2        | 3li8 | 19.8 | 2.9  | 22   | <i>M. mazei</i>                    | histidine kinase | -                                                                            | (4)         |
| Z16       | 3lif | 19.4 | 2.6  | 14   | <i>Rhodospseudomonas palustris</i> | histidine kinase | -                                                                            | (4)         |
| TlpQ      | 6fu4 | 19.4 | 2.7  | 18   | <i>P. aeruginosa</i>               | chemoreceptor    | Histamine and 5 polyamines                                                   | (6)         |
| TlpA      | 6e0a | 19.0 | 3.2  | 17   | <i>Helicobacter pylori</i>         | chemoreceptor    | L-Arg                                                                        | (7)         |
| vcDctB    | 3by9 | 18.5 | 3.0  | 15   | <i>V. cholerae</i>                 | histidine kinase | Various C <sub>4</sub> -dicarboxylates                                       | (8)         |
| smDctB    | 2zbb | 18.3 | 2.7  | 17   | <i>Sinorhizobium meliloti</i>      | histidine kinase | C3- and C <sub>4</sub> -dicarboxylates                                       | unpublished |
| TlpC      | 5wbf | 18.1 | 2.8  | 15   | <i>H. pylori</i>                   | chemoreceptor    | lactate                                                                      | (9)         |
| McpU      | 6f9g | 18.0 | 2.4  | 18   | <i>P. putida</i>                   | chemoreceptor    | Histamine and polyamines                                                     | (10)        |
| Tlp3      | 4xm  | 17.3 | 3.4  | 19   | <i>C. jejuni</i>                   | chemoreceptor    | Ile, Lys, Arg, purine, malic acid, fumarate, succinate glucosamine, thiamine | (11)        |
| vpHK1S-Z8 | 3lid | 16.0 | 3.6  | 13   | <i>Vibrio parahaemolyticus</i>     | histidine kinase | -                                                                            | (4)         |
| HK4       | 3t4k | 14.5 | 3.5  | 16   | <i>Arabidopsis thaliana</i>        | histidine kinase | cytokines                                                                    | (12)        |

<sup>1</sup> This receptor mediates chemotaxis to L-Asp, but an indirect binding mechanism was proposed (5).

**C) Relative positions of the four amino acids conserved in the ligand binding pocket of the three paralogs.** Shown are all atom rmsd values (Å) for each of the amino acids in pairwise structural alignments. Structures in complex with L-Ile (PctA) and L-Gln (PctB) were used in these alignments.

| amino acid <sup>1</sup> | PctA-PctB | PctA-PctC | PctB-PctC |
|-------------------------|-----------|-----------|-----------|
| Y121(124)               | 0.23      | 0.80      | 0.89      |
| R126(129)               | 0.43      | 1.15      | 1.05      |
| W128(131)               | 0.47      | 1.04      | 1.03      |
| D173(176)               | 0.21      | 0.86      | 0.92      |

<sup>1</sup> the residue number in PctC is shown in brackets.

## References

1. Nishiyama S, Takahashi Y, Yamamoto K, Suzuki D, Itoh Y, Sumita K, Uchida Y, Homma M, Imada K, Kawagishi I. 2016. Identification of a *Vibrio cholerae* chemoreceptor that senses taurine and amino acids as attractants. *Sci Rep* 6:20866.
2. Takahashi Y, Nishiyama SI, Sumita K, Kawagishi I, Imada K. 2019. Calcium Ions Modulate Amino Acid Sensing of the Chemoreceptor Mlp24 of *Vibrio cholerae*. *J Bacteriol* 201.
3. Shrestha M, Compton KK, Mancl JM, Webb BA, Brown AM, Scharf BE, Schubot FD. 2018. Structure of the sensory domain of McpX from *Sinorhizobium meliloti*, the first known bacterial chemotactic sensor for quaternary ammonium compounds. *Biochem J* 475:3949-3962.
4. Zhang Z, Hendrickson WA. 2010. Structural characterization of the predominant family of histidine kinase sensor domains. *J Mol Biol* 400:335-53.
5. Machuca MA, Liu YC, Beckham SA, Gunzburg MJ, Roujeinikova A. 2016. The crystal structure of the tandem-PAS sensing domain of *Campylobacter jejuni* chemoreceptor Tlp1 suggests indirect mechanism of ligand recognition. *J Struct Biol* 194:205-13.
6. Corral-Lugo A, Matilla MA, Martin-Mora D, Silva Jimenez H, Mesa Torres N, Kato J, Hida A, Oku S, Conejero-Muriel M, Gavira JA, Krell T. 2018. High-Affinity Chemotaxis to Histamine Mediated by the TlpQ Chemoreceptor of the Human Pathogen *Pseudomonas aeruginosa*. *MBio* 9.
7. Sweeney EG, Perkins A, Kallio K, James Remington S, Guillemin K. 2018. Structures of the ligand-binding domain of *Helicobacter pylori* chemoreceptor TlpA. *Protein Sci* 27:1961-1968.
8. Cheung J, Hendrickson WA. 2008. Crystal structures of C4-dicarboxylate ligand complexes with sensor domains of histidine kinases DcuS and DctB. *J Biol Chem* 283:30256-65.
9. Machuca MA, Johnson KS, Liu YC, Steer DL, Ottemann KM, Roujeinikova A. 2017. *Helicobacter pylori* chemoreceptor TlpC mediates chemotaxis to lactate. *Sci Rep* 7:14089.
10. Gavira JA, Ortega A, Martin-Mora D, Conejero-Muriel MT, Corral-Lugo A, Morel B, Matilla MA, Krell T. 2018. Structural Basis for Polyamine Binding at the

dCACHE Domain of the McpU Chemoreceptor from *Pseudomonas putida*. J Mol Biol 430:1950-1963.

11. Liu YC, Machuca MA, Beckham SA, Gunzburg MJ, Roujeinikova A. 2015. Structural basis for amino-acid recognition and transmembrane signalling by tandem Per-Arnt-Sim (tandem PAS) chemoreceptor sensory domains. Acta Crystallogr D Biol Crystallogr 71:2127-36.
12. Hothorn M, Dabi T, Chory J. 2011. Structural basis for cytokinin recognition by *Arabidopsis thaliana* histidine kinase 4. Nat Chem Biol 7:766-8.
