# Supplementary material for: How Bacterial Chemoreceptors Evolve Novel Ligand Specificities
Source: PubMed Central journal article supplement (PMC6974571; doi:10.1128/mbio.03066-19), 2020-01-21
Supplement: mBio.03066-19-st002.pdf [file mBio.03066-19-st002.pdf]

**Table S2) Glide XP docking scores obtained for PctA-LBD, PctB-LBD and PctC-LBD for the best ligand candidates.** Ligands indicated with an asterisk \* were tested experimentally by Isothermal Titration Calorimetry.

| PctA-LBD                        |        | PctB-LBD                           |        | PctC-LBD                           |        |
|---------------------------------|--------|------------------------------------|--------|------------------------------------|--------|
| <b>Membrane Distal Bundle</b>   |        |                                    |        |                                    |        |
| L-Trp                           | -13.74 | L-Arg                              | -10.38 | GABA                               | -12.32 |
| L-Ile                           | -12.74 | L-Gln                              | -9.37  |                                    |        |
| L-Met                           | -11.53 |                                    |        |                                    |        |
| <b>Membrane Proximal Bundle</b> |        |                                    |        |                                    |        |
| 3-Methylbutyrolactone           | -6.53  | N1-Methyl-4-pyridone-3-carboxamide | -4.47  | 2-aminoethoxy-hydroxy-phosphoryl   | -6.05  |
| 5-Hydroxymethyl-2(5H)-furanone  | -6.51  | Ethanolamine                       | -4.43  | Nadide                             | -6.04  |
| $\gamma$ -Butyrolactone *       | -6.51  | Propylene oxide                    | -4.31  | 1,6-Digalloyl-beta-D-glucopyranose | -5.92  |
| $\gamma$ -Caprolactone *        | -6.41  | 1-Amino-2-propanol                 | -4.29  | 6-Amino-1H-purin-2(7H)-one sulfate | -5.91  |
| Chloral hydrate *               | -6.28  | 2-Hydroxyacetamide                 | -4.21  | Neopterin                          | -5.85  |
| Dihydrofuran-3(2H)-one          | -6.16  | Acetamide                          | -4.11  | Histamine                          | -5.81  |
